# Supplementary material for: In situ construction of active interfaces towards improved high-rate performance of CoSe2
Source: Royal Society of Chemistry journal article supplement (doi:10.1039/d1ta03280a), 2021-01-01
Supplement: d1ta03280a1.pdf [file d1ta03280a1.pdf]

## Supporting Information

### **In-situ construction of active interfaces towards improved high-rate performance of CoSe<sub>2</sub>**

Bo Wang<sup>a,b</sup>, Xiaowei Miao<sup>a</sup>, Huilong Dong<sup>a</sup>, Xue Ma<sup>a</sup>, Jiajun Wu<sup>a</sup>, Yafei Cheng<sup>a\*</sup>,  
Hongbo Geng<sup>a\*</sup>, Cheng Chao Li<sup>b\*</sup>

<sup>a</sup>School of Materials Engineering, Changshu Institute of Technology, Changshu, Jiangsu 215500, China.

<sup>b</sup>School of Chemical Engineering and Light Industry, Guangdong University of Technology, Guangzhou 510006, China.

\*Corresponding authors. E-mail: yafeicheng1990@163.com; hbgeng@gdut.edu.cn; licc@gdut.edu.cn

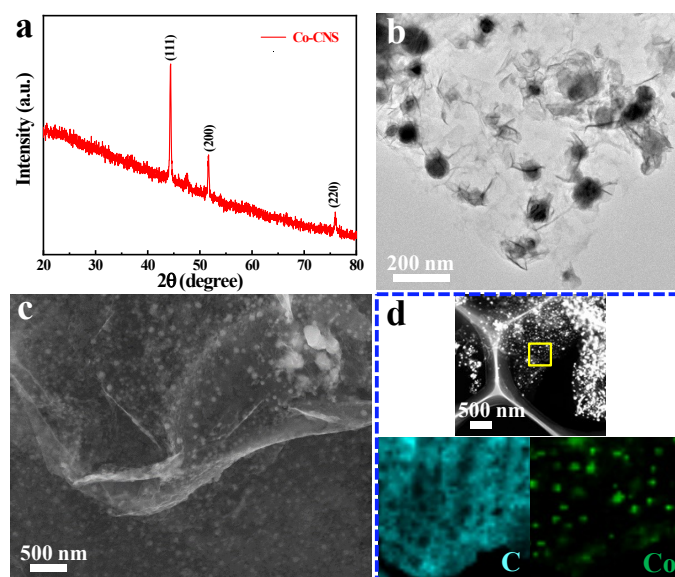

**Fig. S1** The microstructure and morphology of Co-CNS. (a) XRD pattern; (b) TEM image; (c) SEM image, (d) HAADF-STEM image and the EDX mappings.

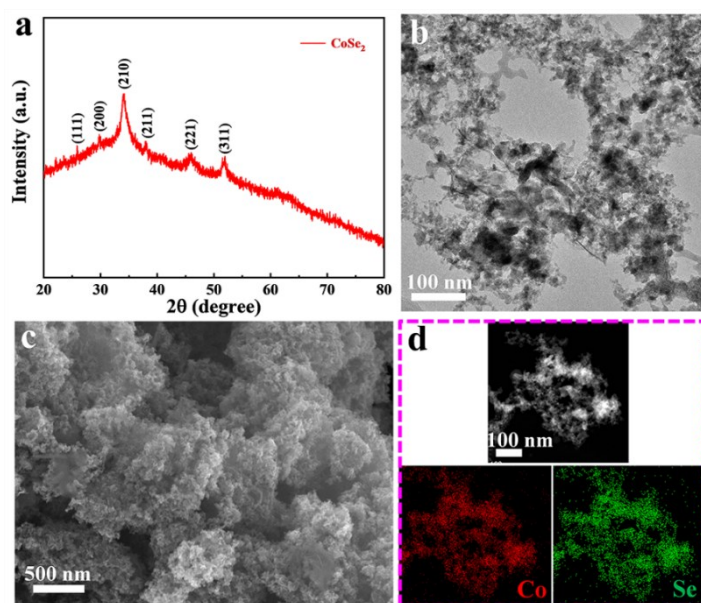

**Fig. S2** The microstructure and morphology of pure  $\text{CoSe}_2$ . (a) XRD pattern; (b) TEM image; (c) SEM image, (d) HAADF-STEM image and the EDX mappings.

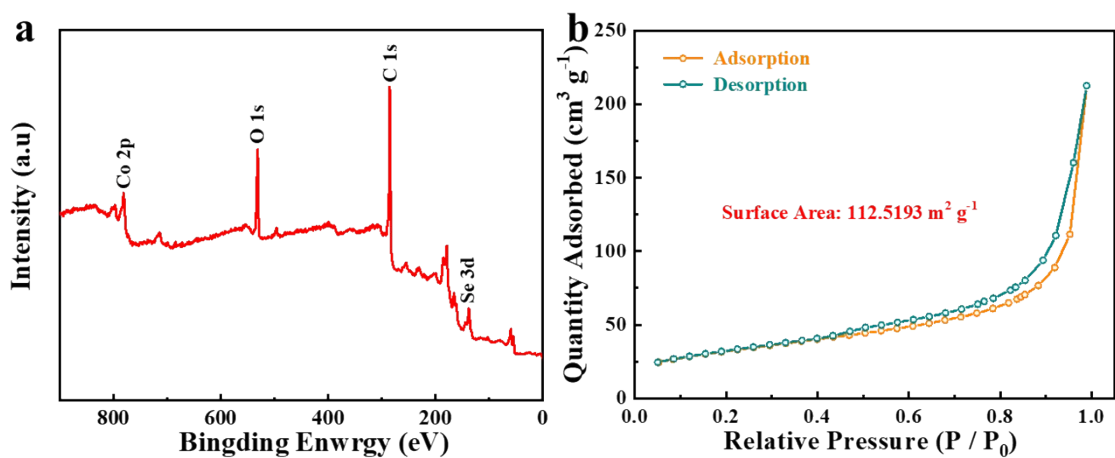

**Fig. S3** (a) The XPS survey spectrum and (b) N<sub>2</sub> adsorption/desorption isotherms of CoSe<sub>2</sub>-CNS.

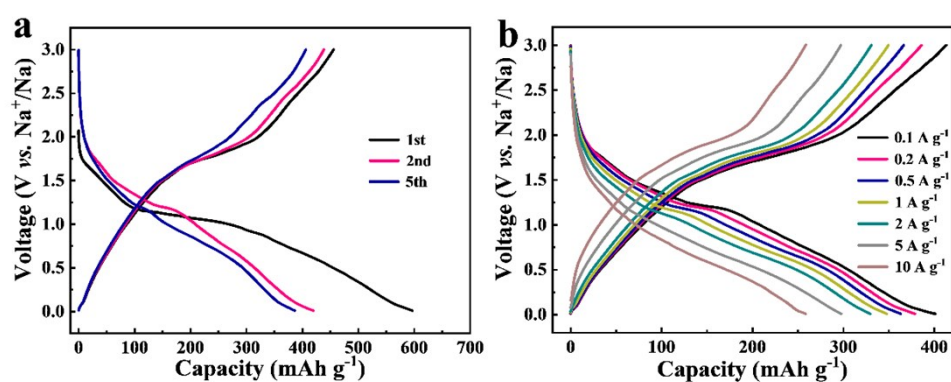

**Fig. S4** (a) The GCD curves at 0.2 A g<sup>-1</sup> and (b) rate capacities at current densities of pure CoSe<sub>2</sub>.

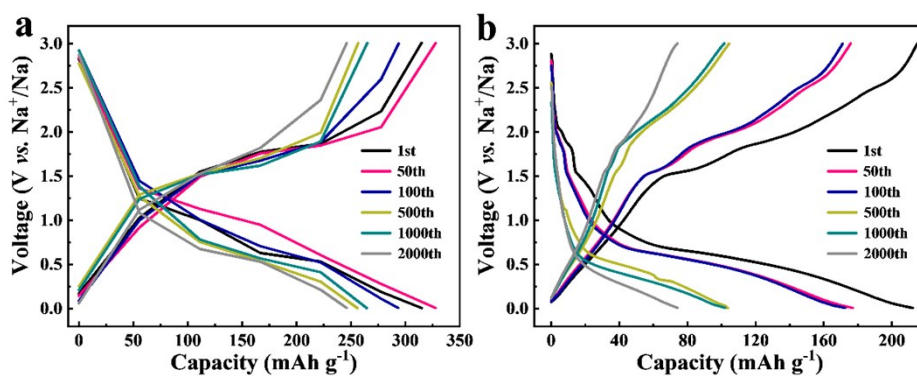

**Fig. S5** The GCD curves at 10 A g<sup>-1</sup> of (a) CoSe<sub>2</sub>-CNS and (b) pure CoSe<sub>2</sub>.

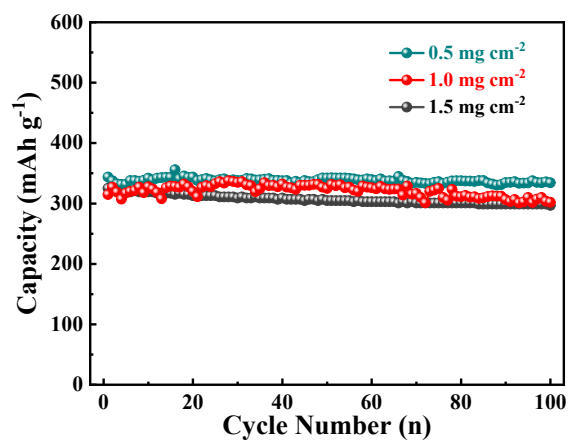

**Fig. S6** Comparative cycling performance of the CoSe<sub>2</sub>-CNS electrode at 10 A g<sup>-1</sup> with different mass loadings (the cells were initially activated at 0.2 A g<sup>-1</sup> for 20 cycles).

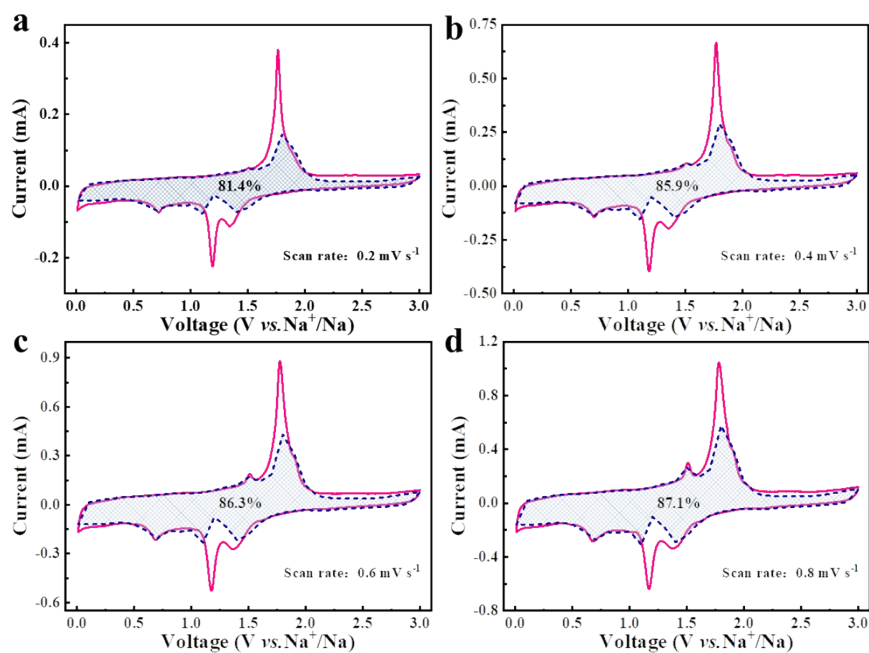

**Fig. S7** Separation of the capacitive (shaded region) and diffusion currents at different scan rates.

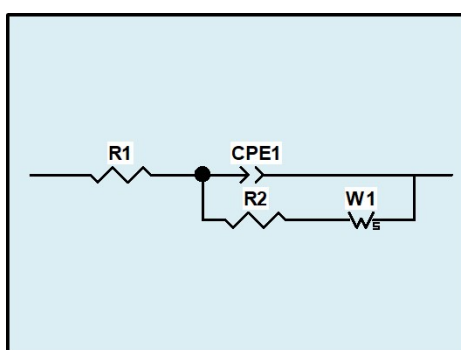

**Fig. S8** The equivalent circuits for the CoSe<sub>2</sub>-CNS and pure CoSe<sub>2</sub> electrodes. R<sub>1</sub> is the ohmic resistance, R<sub>2</sub> is the charge transfer resistance, CPE<sub>1</sub> is the constant phase element, and W<sub>1</sub> is the Warburg impedance. The fitted result shows that the R<sub>2</sub> value of the CoSe<sub>2</sub>-CNS electrode is 9 Ω, which was much lower than that of the pure CoSe<sub>2</sub> electrode (13 Ω), indicating a much faster charge transport kinetics for CoSe<sub>2</sub>-CNS nanosheets.

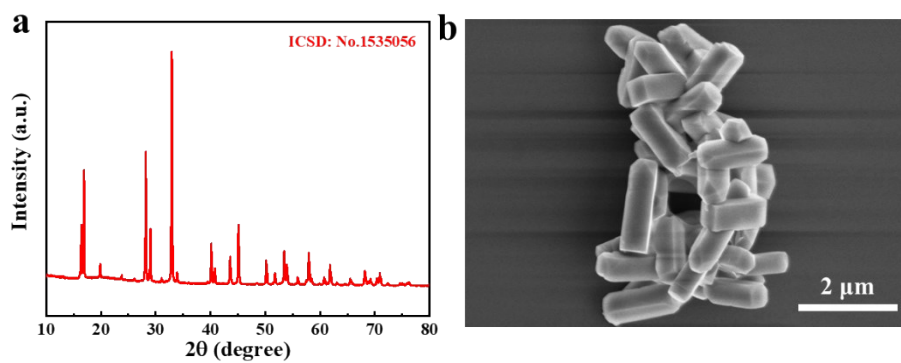

**Fig. S9** (a) XRD and (b) SEM image of the NVPOF.

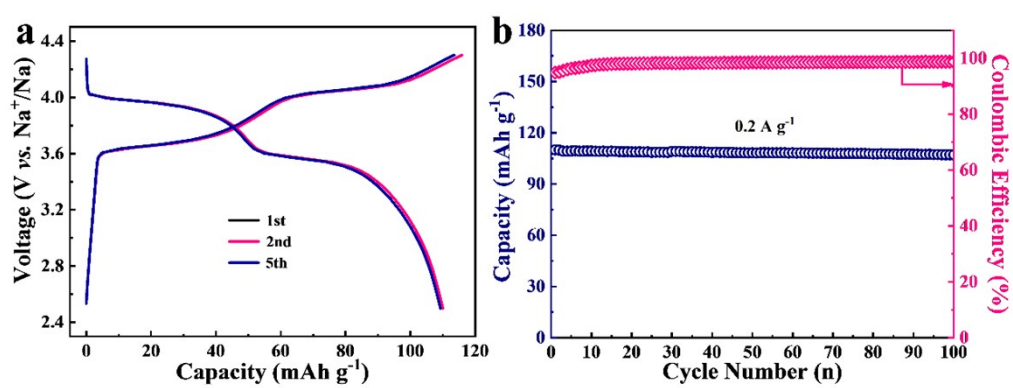

**Fig. S10** The cycle performance at  $0.2\ \text{A g}^{-1}$  of NVPOF cathode.

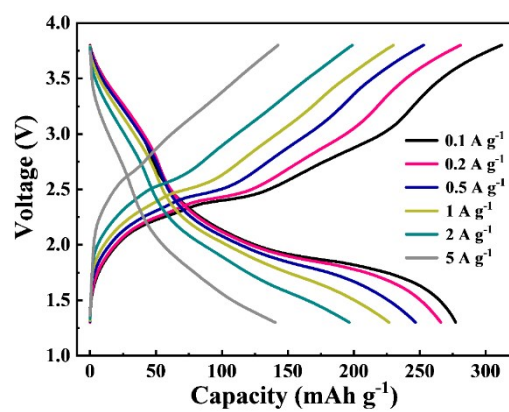

**Fig. S11** The GCD curves of CoSe<sub>2</sub>-CNS/NVPOF full cell at different current densities.
